# Supplementary material for: Electrocatalytic reduction of CO2 by two-dimensional transition metal porphyrin sheets
Source: Royal Society of Chemistry journal article supplement (doi:10.1039/c9ta01188a), 2019-01-01
Supplement: c9ta01188a1.pdf [file c9ta01188a1.pdf]

# Electrocatalytic Reduction of CO<sub>2</sub> by Two-Dimensional Transition Metal Porphyrin Sheets

## *Supplemental Information*

Jin-Hang Liu,<sup>1</sup> Li-Ming Yang\*,<sup>1</sup> and Eric Ganz<sup>2</sup>

<sup>1</sup>Hubei Key Laboratory of Bioinorganic Chemistry and Materia Medica; Key Laboratory of Material Chemistry for Energy Conversion and Storage, Ministry of Education; Hubei Key Laboratory of Materials Chemistry and Service Failure; School of Chemistry and Chemical Engineering, Huazhong University of Science and Technology, Wuhan 430074, China. <sup>2</sup>School of Physics and Astronomy, University of Minnesota, 116 Church St. SE, Minneapolis, Minnesota 55455, USA. (email: Lmyang.uio@gmail.com; Lmyang@hust.edu.cn)

**Figure S1.** The partial density of states of ten TM-PP monolayers. The dotted line denotes the Fermi level, the red and blue lines represent the 3d orbital of the metal atoms and the 2p orbital of the nitrogen atoms, respectively.

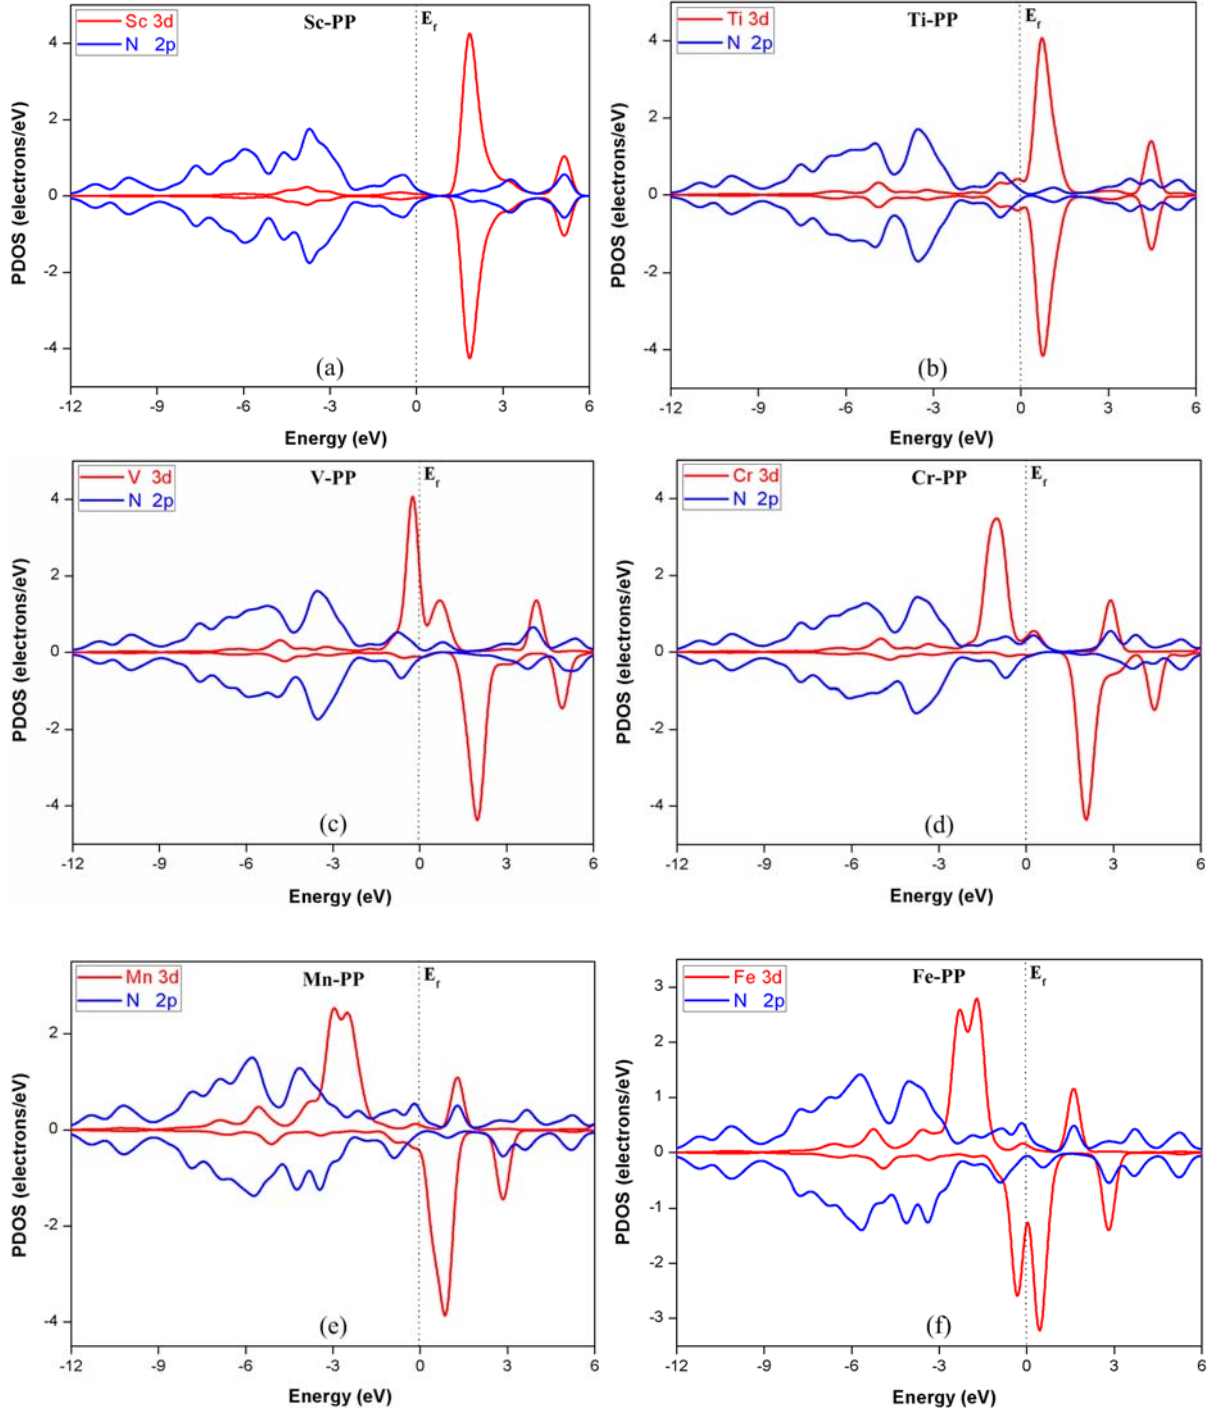

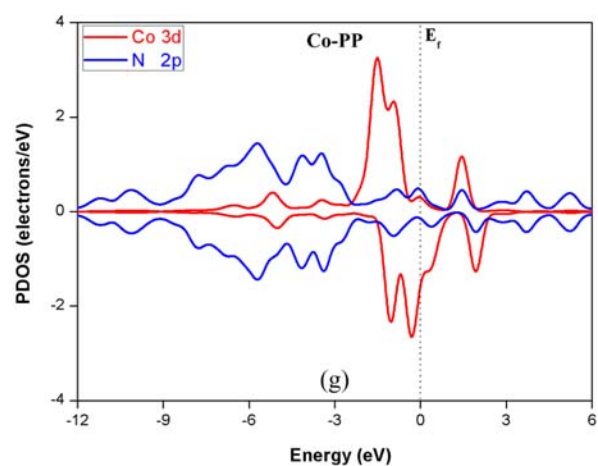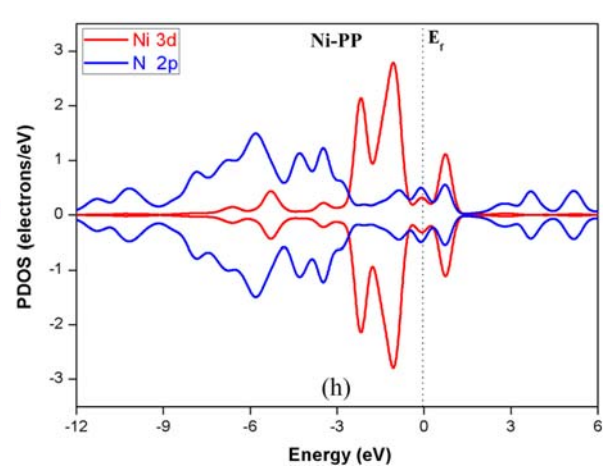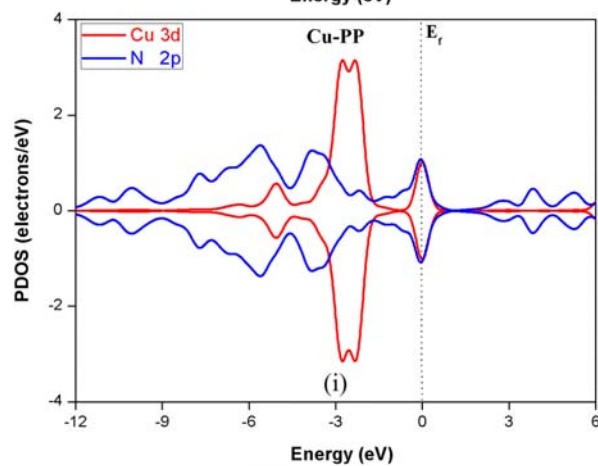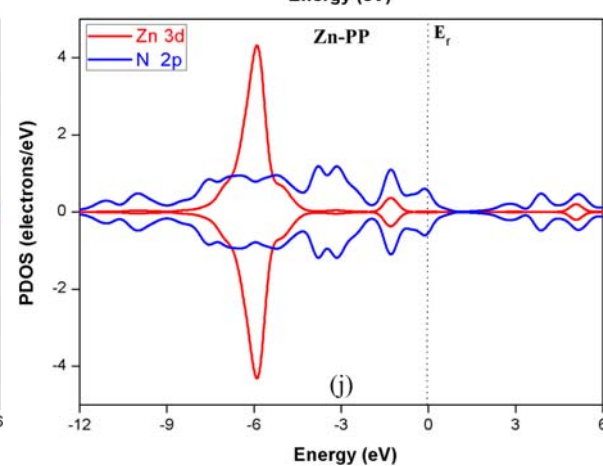

**Table. S1** Properties of TM–PP monolayers: Cohesive energy ( $E_c$ ) of TM bulk, binding energy ( $E_b$ ) between TM and PP, and formation energy ( $E_f$ ).

| TM–PP     | $E_b$ / eV | $E_c$ / eV | $E_f$ / eV |
|-----------|------------|------------|------------|
| <b>Sc</b> | –12.111    | –4.518     | –5.922     |
| <b>Ti</b> | –11.467    | –5.282     | –5.279     |
| <b>V</b>  | –10.466    | –5.632     | –4.277     |
| <b>Cr</b> | –9.399     | –4.547     | –3.210     |
| <b>Mn</b> | –9.340     | –4.247     | –3.151     |
| <b>Fe</b> | –9.699     | –5.283     | –3.510     |
| <b>Co</b> | –9.713     | –5.633     | –3.524     |
| <b>Ni</b> | –8.735     | –4.644     | –2.547     |
| <b>Cu</b> | –6.951     | –3.857     | –0.763     |
| <b>Zn</b> | –5.688     | –1.402     | 0.501      |

<sup>1</sup> $E_b$  is the binding energy of metal atoms on the PP, which is calculated by  $E_b = E_{\text{TM–PP}} - E_{\text{TM}} - E_{\text{PP}}$ , where the  $E_{\text{TM–PP}}$ ,  $E_{\text{TM}}$  and  $E_{\text{PP}}$  are the energies of TM–PP, PP and metal atoms.

<sup>2</sup> $E_c$  is the cohesive energy of the bulk metals, which is calculated by  $E_c = (E_{\text{TM(bulk)}} - nE_{\text{TM}})/n$ , where the  $E_{\text{TM(bulk)}}$  is the energy of metal crystal,  $E_{\text{TM}}$  is the energy of a single metal atom, and  $n$  is the number of metal atoms in the crystal.

<sup>3</sup> $E_f$  is the formation energy of TM–PP, which is calculated by  $E_f = E_{\text{TM–PP}} - n_{\text{TM}}\mu_{\text{TM}} - n_{\text{C}}\mu_{\text{C}} - n_{\text{N}}\mu_{\text{N}}$ , where the  $E_{\text{TM–PP}}$  are the energies of TM–PP,  $n_{\text{TM}}$ ,  $n_{\text{C}}$  and  $n_{\text{N}}$  are the number of TM, C, and N atoms, respectively.  $\mu_{\text{TM}}$ ,  $\mu_{\text{C}}$  and  $\mu_{\text{N}}$  are the chemical potentials of TM, C and N, which are obtained from the single atom of transition metal, graphene, and  $\text{N}_2$ , respectively.

**Table S2** Gibbs free energy change of the first protonation step in the CO<sub>2</sub> reduction reaction (CRR) and H<sub>2</sub> evolution reaction (HER) on the TM–PP in eV.

| TM–PP     | $\Delta G_{H^*}$ | $\Delta G_{C^*OOH}$ | $\Delta G_{O^*CHO}$ |
|-----------|------------------|---------------------|---------------------|
| <b>Sc</b> | 1.076            | 0.390               | −0.756              |
| <b>Ti</b> | 0.066            | −0.441              | −1.311              |
| <b>V</b>  | 0.148            | −0.165              | −0.954              |
| <b>Cr</b> | 0.397            | 0.116               | −0.186              |
| <b>Mn</b> | 0.509            | 0.242               | 0.288               |
| <b>Fe</b> | 0.296            | −0.031              | 0.287               |
| <b>Co</b> | 0.199            | −0.113              | −0.153              |
| <b>Ni</b> | 1.148            | 0.840               | 1.065               |
| <b>Cu</b> | 1.964            | 1.245               | 1.062               |
| <b>Zn</b> | 1.709            | 1.346               | 0.702               |

**Table S3** Adsorption Energy ( $E_{\text{ads}}$ ) of different CO<sub>2</sub> reduction products and the bond length between metal atoms and the carbon or oxygen atoms ( $R_{\text{TM-C/TM-O}}$ ).

|              | TM-PP                               | CO     | HCOOH  | HCHO   | CH <sub>3</sub> OH | CH <sub>4</sub> |
|--------------|-------------------------------------|--------|--------|--------|--------------------|-----------------|
| <b>Sc-PP</b> | $R_{\text{Sc-C/Sc-O}} / \text{\AA}$ | 2.395  | 2.159  | 2.169  | 2.134              | 2.499           |
|              | $E_{\text{ads}} / \text{eV}$        | -0.529 | -1.004 | -1.021 | -1.277             | -0.322          |
| <b>Ti-PP</b> | $R_{\text{Ti-C/Ti-O}} / \text{\AA}$ | 2.075  | 2.053  | 2.007  | 2.069              | 2.365           |
|              | $E_{\text{ads}} / \text{eV}$        | -1.409 | -1.282 | -1.412 | -1.592             | -0.523          |
| <b>V-PP</b>  | $R_{\text{V-C/V-O}} / \text{\AA}$   | 1.975  | 2.020  | 1.969  | 2.008              | 2.470           |
|              | $E_{\text{ads}} / \text{eV}$        | -1.431 | -1.087 | -1.258 | -1.306             | -0.368          |
| <b>Cr-PP</b> | $R_{\text{Cr-C/Cr-O}} / \text{\AA}$ | 1.862  | 2.035  | 1.973  | 2.036              | 3.098           |
|              | $E_{\text{ads}} / \text{eV}$        | -0.993 | -0.435 | -0.585 | -0.656             | -0.233          |
| <b>Mn-PP</b> | $R_{\text{Mn-C/Mn-O}} / \text{\AA}$ | 2.150  | 2.268  | 2.274  | 2.204              | 3.065           |
|              | $E_{\text{ads}} / \text{eV}$        | -0.474 | -0.458 | -0.564 | -0.675             | -0.258          |
| <b>Fe-PP</b> | $R_{\text{Fe-C/Fe-O}} / \text{\AA}$ | 1.712  | 2.218  | 2.212  | 2.211              | 3.002           |
|              | $E_{\text{ads}} / \text{eV}$        | -1.383 | -0.473 | -0.596 | -0.779             | -0.268          |
| <b>Co-PP</b> | $R_{\text{Co-C/Co-O}} / \text{\AA}$ | 1.784  | 2.186  | 2.159  | 2.182              | 3.536           |
|              | $E_{\text{ads}} / \text{eV}$        | -0.889 | -0.344 | -0.492 | -0.652             | -0.176          |
| <b>Ni-PP</b> | $R_{\text{Ni-C/Ni-O}} / \text{\AA}$ | 2.077  | 2.929  | 2.870  | 2.696              | 3.199           |
|              | $E_{\text{ads}} / \text{eV}$        | 0.012  | -0.104 | -0.215 | -0.314             | -0.212          |
| <b>Cu-PP</b> | $R_{\text{Cu-C/Cu-O}} / \text{\AA}$ | 2.850  | 2.563  | 2.581  | 2.441              | 3.144           |
|              | $E_{\text{ads}} / \text{eV}$        | -0.251 | -0.250 | -0.274 | -0.496             | -0.311          |
| <b>Zn-PP</b> | $R_{\text{Zn-C/Zn-O}} / \text{\AA}$ | 2.385  | 2.261  | 2.280  | 2.208              | 3.052           |
|              | $E_{\text{ads}} / \text{eV}$        | -0.264 | -0.357 | -0.455 | -0.657             | -0.235          |

**Table S4** Adsorption Energies ( $E_{\text{ads}}$ ) of the intermediates in the potential determining steps of CRR on the TM-PP monolayers:  $\text{C}^*\text{O}$  (for Mn and V),  $\text{C}^*\text{H}_2\text{OH}$  (for Ti),  $\text{O}^*\text{CHOH}$  (for Cr, Fe and Co),  $\text{C}^*\text{OOH}$  (for Sc and Ni) and  $\text{O}^*\text{CHO}$  (for Cu and Zn). The bond length between metal atom and the carbon atom or the oxygen atom ( $R_{\text{TM-C/TM-O}}$ ).

| <b>TM-PP</b>                                          | <b>Sc-PP</b> | <b>Ti-PP</b> | <b>V-PP</b>  | <b>Cr-PP</b> | <b>Mn-PP</b> |
|-------------------------------------------------------|--------------|--------------|--------------|--------------|--------------|
| <b><math>R_{\text{TM-C/TM-O}} / \text{\AA}</math></b> | 2.193        | 2.133        | 1.975        | 2.235        | 2.150        |
| <b><math>E_{\text{ads}} / \text{eV}</math></b>        | -1.620       | -2.306       | -1.431       | -0.435       | -0.474       |
| <b>TM-PP</b>                                          | <b>Fe-PP</b> | <b>Co-PP</b> | <b>Ni-PP</b> | <b>Cu-PP</b> | <b>Zn-PP</b> |
| <b><math>R_{\text{TM-C/TM-O}} / \text{\AA}</math></b> | 2.218        | 2.186        | 1.961        | 2.073        | 2.106        |
| <b><math>E_{\text{ads}} / \text{eV}</math></b>        | -0.473       | -0.344       | -1.238       | -1.172       | -1.536       |
